# Supplementary material for: Formation of complex self-assembled aggregates in non-ionic chromonics: dimer and trimer columns, layer structures and spontaneous chirality
Source: Royal Society of Chemistry journal article supplement (doi:10.1039/c6sm01669c), 2016-01-01
Supplement: c6sm01669c1.pdf [file c6sm01669c1.pdf]

Journal Name

ARTICLE

## Spontaneous formation of self-assembled chiral aggregates in a non-ionic chromonic

Received 00th January 20xx,  
Accepted 00th January 20xx

Martin Walker<sup>a</sup> and Mark R. Wilson<sup>a</sup>

DOI: 10.1039/x0xx00000x

[www.rsc.org/](http://www.rsc.org/)

### Supplementary Information

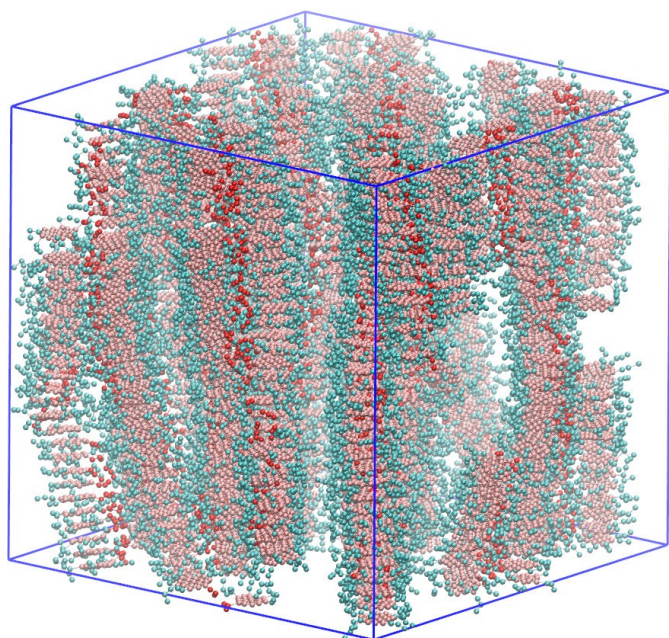

**Fig S1** Snapshot showing the structure of the N phase for model 1 at 50 wt% concentration.

**Fig S2** An mp4 movie showing dynamic chirality inversion in a single chromonic column for model 2, taken from a simulation at 25 wt% concentration.

<sup>a</sup> Department of Chemistry, Durham University, Lower Mountjoy, South Road, Durham, DH1 3LE, UK. Tel: +44 (0) 191 384 1158;

E-mail: [mark.wilson@durham.ac.uk](mailto:mark.wilson@durham.ac.uk)
